# Supplementary material for: Magnitude of the Freshwater Turtle Exports from the US: Long Term Trends and Early Effects of Newly Implemented Harvest Management Regimes
Source: PLOS journal article supplement (doi:10.1371/journal.pone.0086478), 2014-01-27
Supplement: S1 (10.1371/journal.pone.0086478.s001) [file journal.pone.0086478.s001]

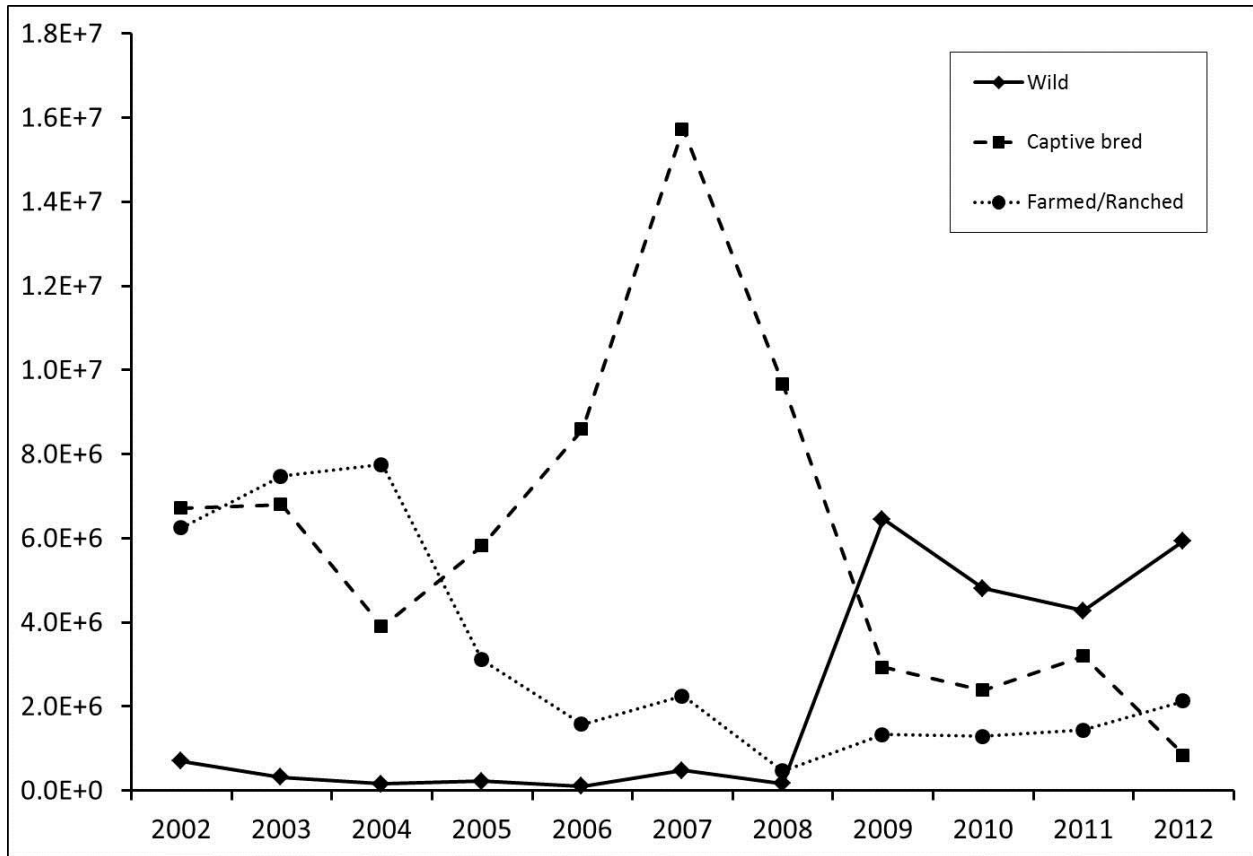

Supplemental Fig. S1. Total number of exported turtles (y-axis) from 2002-2012 (x-axis) partitioned by the source of turtles.
