# Supplementary material for: Magnitude of the Freshwater Turtle Exports from the US: Long Term Trends and Early Effects of Newly Implemented Harvest Management Regimes
Source: PLOS journal article supplement (doi:10.1371/journal.pone.0086478), 2014-01-27
Supplement: S2 (10.1371/journal.pone.0086478.s002) [file journal.pone.0086478.s002]

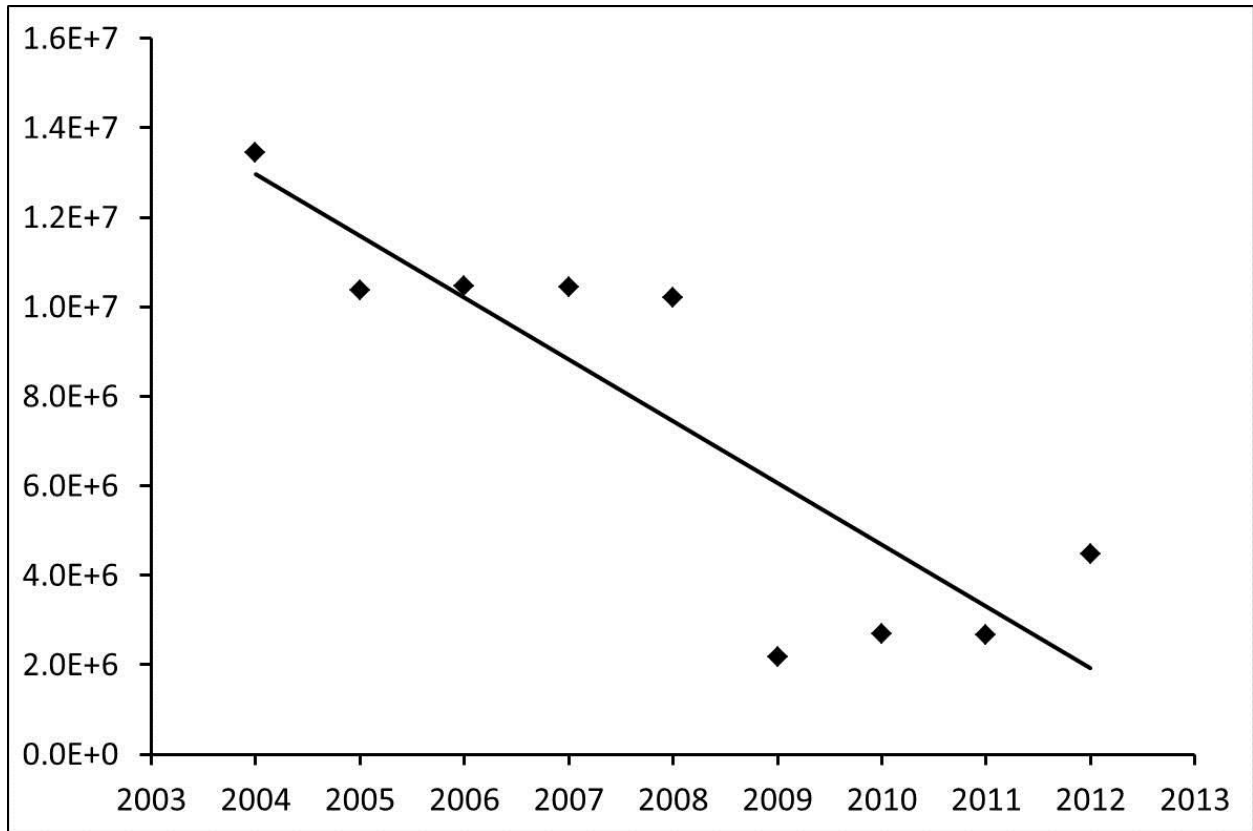

Supplemental Fig.S2. Total production of freshwater turtles (y-axis) on Louisiana farms from 2002-2012 (y-axis).
